# Supplementary material
Source: Springer Nature journal article supplement (https://www.springermedizin.de/resource/supplementary/12916_2014_987_MOESM1_ESM.pdf/9598962)
Supplement: MOESM1 [file 9598962]

## Search strategy

*Search performed:* March 1, 2013

*Databases:* Embase <1988 to 2013 Week 08>, Ovid MEDLINE(R) In-Process & Other Non-Indexed

Citations and Ovid MEDLINE(R) <1946 to Present>

*Search terms:*

- 1 "randomized controlled trial".pt. (341377)
- 2 (random\$ or placebo\$ or single blind\$ or double blind\$ or triple blind\$).ti,ab.
- 3 (retraction of publication or retracted publication).pt.
- 4 1 or 2 or 3
- 5 (animals not humans).sh.
- 6 ((comment or editorial or meta-analysis or practice-guideline or review or letter or journal correspondence) not "randomized controlled trial").pt.
- 7 (random sampl\$ or random digit\$ or random effect\$ or random survey or random regression).ti,ab. not "randomized controlled trial".pt.
- 8 5 or 6 or 7
- 9 4 not 8
- 10 (random\$ or placebo\$ or single blind\$ or double blind\$ or triple blind\$).ti,ab.
- 11 RETRACTED ARTICLE/
- 12 10 or 11
- 13 (animal\$ not human\$).sh,hw.
- 14 (book or conference paper or editorial or letter or review).pt. not exp randomized controlled trial/
- 15 (random sampl\$ or random digit\$ or random effect\$ or random survey or random regression).ti,ab. not exp randomized controlled trial/
- 16 13 or 14 or 15
- 17 12 not 16
- 18 9 or 17
- 19 exp breast neoplasms/
- 20 ((breast or mammary or mammarian) and (cancer\$ or carcinoma\$ or neoplasm\$ or tumo?r\$ or malignan\$)).tw.
- 21 exp Breast Cancer/
- 22 19 or 20 or 21

- 23 (Advanc\$ or metasta\$3 or stage 3 or stage III or stage 4 or stage IV).ti,ab.
- 24 22 and 23
- 25 chemotherap\*.mp.
- 26 exp Drug Therapy/
- 27 (chemotherap\* adj6 alone).mp
- 28 endocrine therap\*.mp
- 29 chemotherapy/
- 30 chemotherap\*.mp. [mp=ti, ab, sh, hw, tn, ot, dm, mf, dv, kw, nm, kf, ps, rs, ui]
- 31 (endocrine and therap\*).mp. [mp=ti, ab, sh, hw, tn, ot, dm, mf, dv, kw, nm, kf, ps, rs, ui]  
  
(megestrol acetate or Megace or tamoxifen or Nolvadex or Istubal or Valodex or exemestane or Aromasin or everolimus or Afinitor or cyclophosphamide or Endoxan or Cytosan or Neosar or Procytox or Revimmune or methotrexate or fluorouracil or 5-fluorouracil or Efudex or doxorubicin or Adriamycin or mitoxantrone or mitozantrone or Novantrone or epirubicin or Ellence or paclitaxel or Taxol or docetaxel or Taxotere or lipsosomal doxorubicin or Doxil or nab-paclitaxel or Abraxane or eribulin or Halaven or capecitabine or Xeloda).ti,ab.
- 32
- 33 25 or 26 or 27 or 28 or 29 or 30 or 31 or 32
- 34 18 and 24 and 33
- 35 limit 34 to english language
- 36 limit 35 to human
- 37 limit 36 to humans
- 38 remove duplicates from 37
